# Supplementary material
Source: PubMed Central journal article supplement (PMC2795540)
Supplement: 0911626106_0911626106SI.pdf [file 0911626106_0911626106SI.pdf]

# Supporting Information

Manton et al. 10.1073/pnas.0911626106

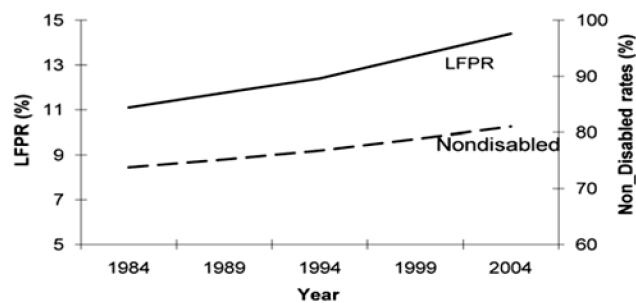

Fig. S1. LFPR as a function of DDR from NLTC5 1984 to 2004

**Table S1. Per annum national wealth and tax revenue increase due to labor force growth in the US elderly population for 2010, 2020, and 2030**

| Year | Labor force increment to 2000 labor force (4,100,000), million | Labor force, million | LFPR, % | National wealth increase due to labor force increase, \$ billion | Tax revenues increase due to labor force increase, \$ billion |
|------|----------------------------------------------------------------|----------------------|---------|------------------------------------------------------------------|---------------------------------------------------------------|
| 2010 | 2.4                                                            | 6.7                  | 17.5    | 294                                                              | 59                                                            |
| 2020 | 6.9                                                            | 11.2                 | 21.5    | 1267                                                             | 253                                                           |
| 2030 | 9.4                                                            | 13.7                 | 20.2    | 2594                                                             | 519                                                           |

Table S2. Health dynamic projection of per annum national wealth and tax revenues increase for 2010, 2020, and 2030

| Year | US age 65+ population, million | Labor force increment to 2000 labor force |      |       | Labor force, million | LFPR, % | Annual LFPR growth, % | National wealth increase due to labor force increase, \$ billion | Tax revenues increase due to labor force increase, \$ billion | Reductions in Medicare cost due to nondisabled persons' health, \$ billion |
|------|--------------------------------|-------------------------------------------|------|-------|----------------------|---------|-----------------------|------------------------------------------------------------------|---------------------------------------------------------------|----------------------------------------------------------------------------|
|      |                                | DDR                                       | MCI  | Total |                      |         |                       |                                                                  |                                                               |                                                                            |
| 2010 | 38.1                           | 0.3                                       | 2.0  | 2.3   | 6.6                  | 17.3    | 282                   | 56                                                               | 105                                                           |                                                                            |
| 2020 | 52.1                           | 0.8                                       | 7.7  | 8.5   | 12.8                 | 24.6    | 1561                  | 312                                                              | 242                                                           |                                                                            |
| 2030 | 68.0                           | 1.3                                       | 15.5 | 16.8  | 21.1                 | 31.0    | 4637                  | 927                                                              | 530                                                           |                                                                            |

**Table S3. Projection (2020 and 2030) of net effects due to the labor force increase and Medicare cost reduction in nondisabled persons' health in the US elderly population**

| Year | "Toossi" |                               |                                                               | Health dynamics model |                               |                                                               |                                                               |                               | Difference between the BLS and health dynamics model, \$ billion |
|------|----------|-------------------------------|---------------------------------------------------------------|-----------------------|-------------------------------|---------------------------------------------------------------|---------------------------------------------------------------|-------------------------------|------------------------------------------------------------------|
|      | LFPR, %  | Labor force increase, million | Tax revenues increase due to labor force increase, \$ billion | Projected LFPR, %     | Labor force increase, million | Tax revenues increase due to labor force increase, \$ billion | Medicare cost reduction due to health improvement, \$ billion | Net total effects, \$ billion |                                                                  |
| 2020 | 21.5     | 6.9                           | 253                                                           | 24.6                  | 8.5                           | 312                                                           | 242                                                           | 554                           | 301                                                              |
|      | 29.5     | 11.1                          | 406                                                           | 31.3                  | 12.0                          | 441                                                           | 242                                                           | 683                           | 277                                                              |
|      | 42.8     | 18.0                          | 661                                                           | 43.4                  | 18.3                          | 672                                                           | 242                                                           | 914                           | 253                                                              |
| 2030 | 21.5     | 10.3                          | 569                                                           | 31.0                  | 16.8                          | 927                                                           | 530                                                           | 1,457                         | 888                                                              |
|      | 29.5     | 15.8                          | 872                                                           | 44.3                  | 25.8                          | 1,424                                                         | 530                                                           | 1,954                         | 1,082                                                            |
|      | 42.8     | 24.8                          | 1,369                                                         | 65.7                  | 40.4                          | 2,230                                                         | 530                                                           | 2,760                         | 1,391                                                            |

"Toossi" model: unknown health dynamics (assume no change in health care).
